# Supplementary material
Source: PubMed Central journal article supplement (PMC3949156)
Supplement: NIHMS537783-supplement-supplement_1.pdf [file NIHMS537783-supplement-supplement_1.pdf]

## SUPPLEMENTAL TABLE

**SUPPLEMENTAL TABLE 1.** Distribution of select characteristics of men in the HIM study by smoking status

| Characteristic                         | Baseline & Last Follow-up <sup>1</sup> |                 |                |               | P-value <sup>2</sup> |
|----------------------------------------|----------------------------------------|-----------------|----------------|---------------|----------------------|
|                                        | Overall                                | Current Smokers | Former Smokers | Never Smokers |                      |
| <b>Age</b>                             |                                        |                 |                |               | <b>&lt; 0.001</b>    |
| 18 to 30                               | 1678 (47.3%)                           | 379 (48.2%)     | 188 (30.3%)    | 1111 (51.9%)  |                      |
| 31 to 44                               | 1394 (39.3%)                           | 314 (39.9%)     | 264 (42.6%)    | 816 (38.1%)   |                      |
| 45 to 70                               | 475 (13.4%)                            | 94 (11.9%)      | 168 (27.1%)    | 213 (10.0%)   |                      |
| Total                                  | 3547 (100%)                            | 787(100%)       | 620 (100%)     | 2140 (100%)   |                      |
| <b>Race</b>                            |                                        |                 |                |               | <b>&lt; 0.001</b>    |
| White                                  | 1610 (46.0%)                           | 314 (40.5%)     | 296 (48.1%)    | 1000 (47.4%)  |                      |
| Black                                  | 559 (16.0%)                            | 106 (13.7%)     | 63 (10.2%)     | 390 (18.5%)   |                      |
| Asian/PI                               | 101 (2.9%)                             | 10 (1.3%)       | 6 (1.0%)       | 85 (4.0%)     |                      |
| Other                                  | 1233 (35.2%)                           | 346 (44.6%)     | 251 (40.7%)    | 636 (30.1%)   |                      |
| Total                                  | 3503 (100%)                            | 776 (100%)      | 616 (100%)     | 2111 (100%)   |                      |
| <b>Ethnicity</b>                       |                                        |                 |                |               | <b>&lt; 0.001</b>    |
| Hispanic                               | 1568 (44.6%)                           | 426 (54.5%)     | 295 (47.8%)    | 847 (39.9%)   |                      |
| Non – Hispanic                         | 1951 (55.4%)                           | 355 (45.5%)     | 322 (52.2%)    | 1274 (60.1%)  |                      |
| Total                                  | 3519 (100%)                            | 781 (100%)      | 617 (100%)     | 2121 (100%)   |                      |
| <b>Clinic Site/Country</b>             |                                        |                 |                |               | <b>&lt; 0.001</b>    |
| United States                          | 1149 (32.4%)                           | 222 (28.2%)     | 174 (28.1%)    | 753 (35.2%)   |                      |
| Brazil                                 | 1263 (35.6%)                           | 222 (28.2%)     | 217 (35.0%)    | 824 (38.5%)   |                      |
| Mexico                                 | 1136 (32.0%)                           | 343 (43.6%)     | 229 (36.9%)    | 564 (26.3%)   |                      |
| Total                                  | 3548 (100%)                            | 787 (100%)      | 620 (100%)     | 2141 (100%)   |                      |
| <b>Circumcision status</b>             |                                        |                 |                |               | <b>&lt; 0.001</b>    |
| Not Circumcised                        | 2267 (63.9%)                           | 528 (67.1%)     | 395 (63.7%)    | 1344 (62.8%)  |                      |
| Circumcised                            | 1280 (36.1%)                           | 259 (32.9%)     | 225 (36.3%)    | 796 (37.2%)   |                      |
| Total                                  | 3547 (100%)                            | 787 (100%)      | 620 (100%)     | 2140 (100%)   |                      |
| <b>Lifetime No. of Female Partners</b> |                                        |                 |                |               | <b>&lt; 0.001</b>    |
| 0 to 1                                 | 610 (17.2%)                            | 94 (11.9%)      | 49 (7.9%)      | 467 (21.8%)   |                      |
| 2 to 9                                 | 1422 (40.1%)                           | 281 (35.7%)     | 242 (39.0%)    | 899 (42.0%)   |                      |
| 10 to 49                               | 1125 (31.7%)                           | 299 (38.0%)     | 252 (40.6%)    | 574 (26.8%)   |                      |
| 50+                                    | 199 (5.6%)                             | 54 (6.9%)       | 42 (6.8%)      | 103 (4.8%)    |                      |
| Refused                                | 191 (5.4%)                             | 59 (7.5%)       | 35 (5.6%)      | 97 (4.5%)     |                      |
| Total                                  | 3547 (100%)                            | 787(100%)       | 620 (100%)     | 2140 (100%)   |                      |

**SUPPLEMENTAL TABLE 1.** Continued

| Characteristic                                      | Baseline & Last Follow-up <sup>1</sup> |                 |                |               | P-value <sup>2</sup> |
|-----------------------------------------------------|----------------------------------------|-----------------|----------------|---------------|----------------------|
|                                                     | Overall                                | Current Smokers | Former Smokers | Never Smokers |                      |
| <b>No. of Female Partners in Past 3 or 6 Months</b> |                                        |                 |                |               | <b>&lt; 0.001</b>    |
| None                                                | 743 (20.9%)                            | 169 (21.5%)     | 164 (26.5%)    | 410 (19.2%)   |                      |
| 1                                                   | 1460 (41.2%)                           | 311 (39.5%)     | 283 (45.6%)    | 866 (40.5%)   |                      |
| 2                                                   | 460 (13.0%)                            | 107 (13.6%)     | 70 (11.3%)     | 283 (13.2%)   |                      |
| 3+                                                  | 451 (12.7%)                            | 110 (14.0%)     | 67 (10.8%)     | 274 (12.8%)   |                      |
| Refused                                             | 433 (12.2%)                            | 90 (11.4%)      | 36 (5.8%)      | 307 (14.3%)   |                      |
| Total                                               | 3547 (100%)                            | 787 (22.2%)     | 620 (17.5%)    | 2140 (60.3%)  |                      |
| <b>Lifetime No. of Male Partners</b>                |                                        |                 |                |               | <b>0.042</b>         |
| 0 to 1                                              | 3184 (90.4%)                           | 686 (88.2%)     | 559 (90.6%)    | 1939 (91.2%)  |                      |
| 2 to 9                                              | 195 (5.5%)                             | 47 (6.0%)       | 39 (6.3%)      | 109 (5.1%)    |                      |
| 10+                                                 | 143 (4.1%)                             | 45 (5.8%)       | 19 (3.1%)      | 79 (3.7%)     |                      |
| Total                                               | 3522 (100%)                            | 778 (22.1%)     | 617 (17.5%)    | 2127 (60.4%)  |                      |

<sup>1</sup>The demographic features were analyzed by smoking status among men who reported the same smoking status at both the baseline and their last follow-up

<sup>2</sup>P-value Pearson's chi-square test comparing demographics by smoking status for Baseline & LFU
